# Supplementary material for: β-FeOOH Interlayer With Abundant Oxygen Vacancy Toward Boosting Catalytic Effect for Lithium Sulfur Batteries
Source: Front Chem. 2020 Apr 23;8:309. doi: 10.3389/fchem.2020.00309 (PMC7192061; doi:10.3389/fchem.2020.00309)
Supplement: Supplementary file 1 [file Data_Sheet_1.docx]

Supporting Information

**β-FeOOH interlayer with abundant oxygen vacancy towards boosting catalytic effect for lithium sulfur batteries**

Yingying Lia, Xifei Lia,b,c*,Youchen Haob, Alibek Kakimovb, Dejun Lia, Qian Sund, Liang Koue, Zhanyuan Tiane, Le Shaoe, Cheng Zhange, Jiujun Zhangb,f, Xueliang Suna,b,d

aTianjin International Joint Research Centre of Surface Technology for Energy Storage Materials, Energy & Materials Engineering Centre, College of Physics and Materials Science, Tianjin Normal University, Tianjin 300387, China.

bXi'an Key Laboratory of New Energy Materials and Devices, Institute of Advanced Electrochemical Energy & School of Materials Science and Engineering, Xi’an University of Technology, Xi’an 710048, Shaanxi, China.

cState Center for International Cooperation on Designer Low-carbon &Environmental Materials (CDLCEM), Zhengzhou University, 100 Kexue Avenue, Zhengzhou 450001, China.

dDepartment of Mechanical and Materials Engineering, University of Western Ontario, London, Ontario N6A 5B9, Canada.

eShaanxi Coal Chem Ind Technol Res Inst Co Ltd, Xian, Shaanxi 710070, China.

fDepartment of Chemistry, College of Sciences/Institute for Sustainable Energy, Shanghai University, Shanghai, 200444, China

*Email: xfli2011@hotmail.com


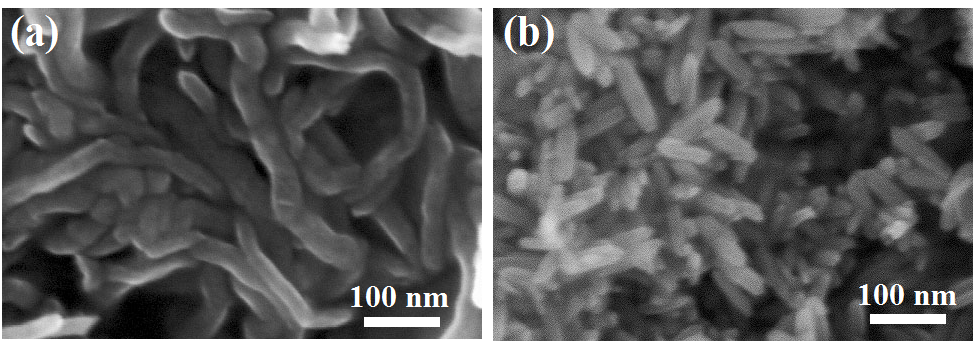


Figure S1. SEM images of (a) CNTs and (b) bare FeOOH sticks.


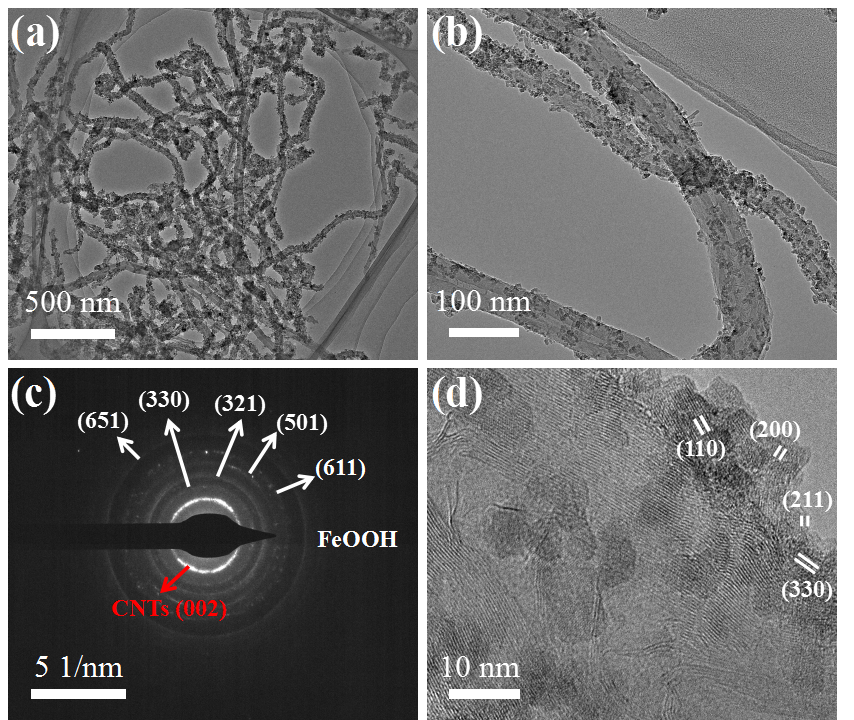


Figure S2. High and low-maganification TEM images of CNTs@FeOOH-II compounds and the corresponding SAED.


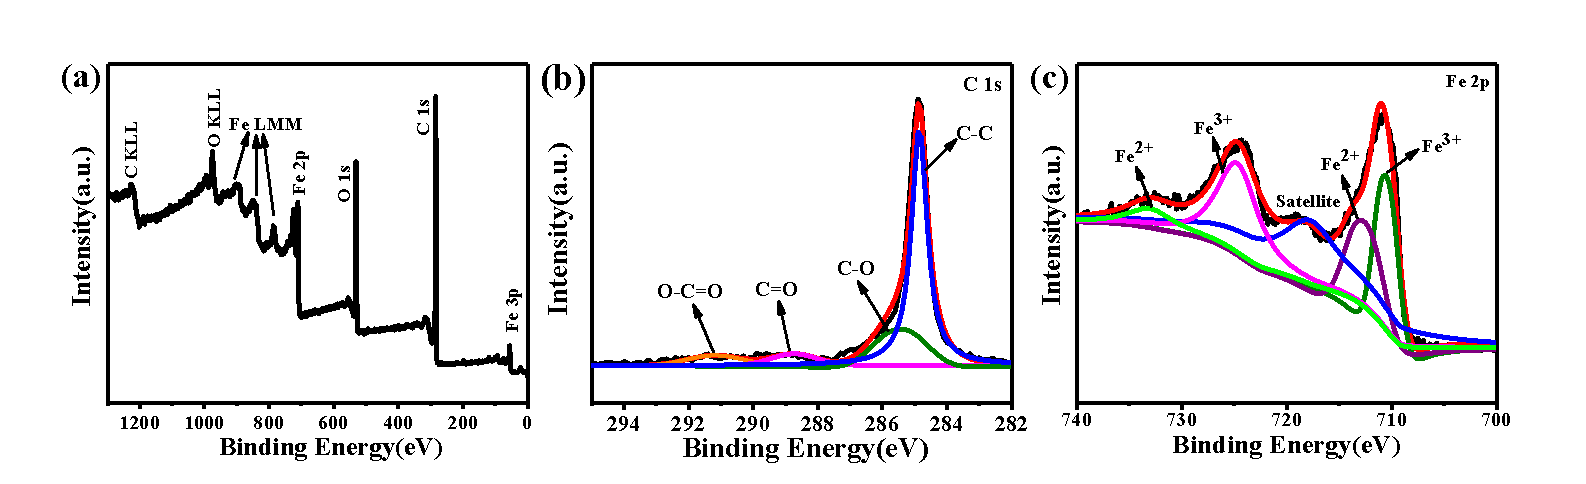


Figure S3. High-resolution XPS spectra of the (a) original XPS survey spectra, (b) C1s and (c) Fe 2p of CNTs@FeOOH-II composite.


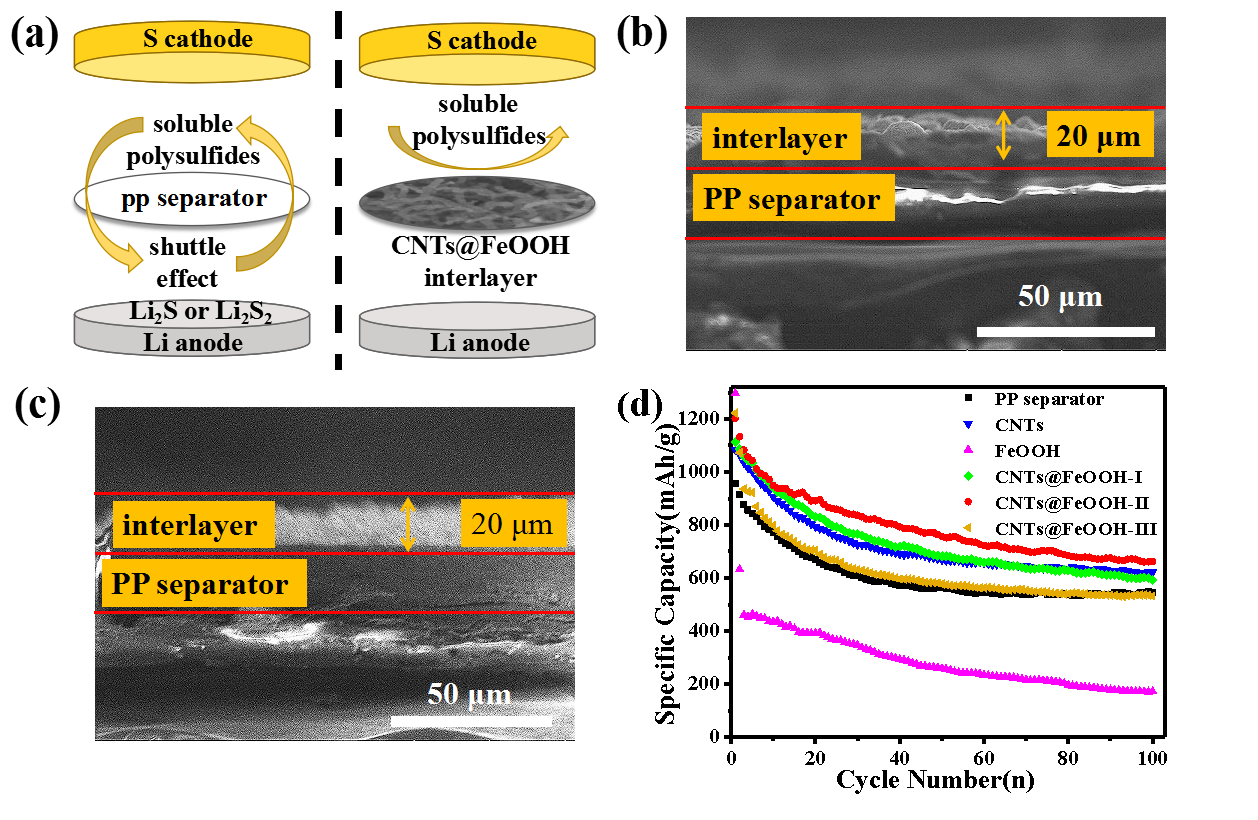


Figure S4. (a) Schematic diagram of conventional and improved Li-S cells; cross section of (b) CNTs@FeOOH-I and (c) CNTs@FeOOH-III interlayer; (d) Cycle performance of batteries with PP, CNTs, FeOOH, and CNTs@FeOOH separator, respectively, at 320 mA g-1.


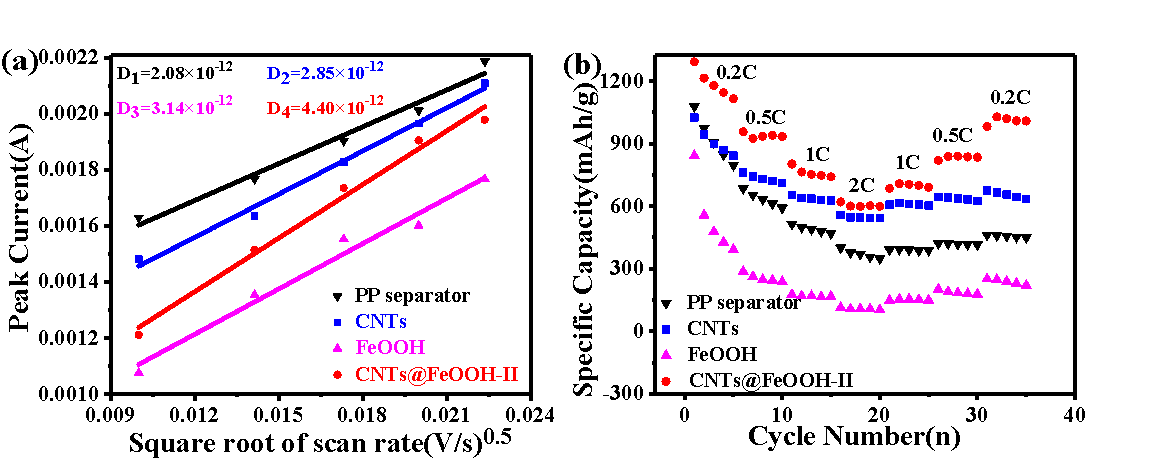


Figure S5. (a) The corresponding relationship between the square root of the scan rate V0.5 and peak current Ip of CNTs@FeOOH-II in a voltage range of 1.7–2.8 V vs. Li+/Li. (b) rate capability of four kinds of separator.

**Table S1** Comparison of the Li-S batteries with different functional interlayer, with results from this work and from the literature


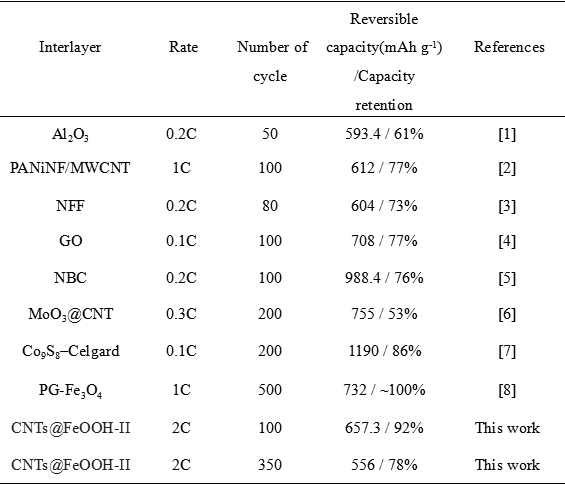


**References**

**[1]** Zhang Z; Lai Y; Zhang Z; Zhang K; Li J. Al2O3-coated porous separator for enhanced electrochemical performance of lithium sulfur batteries. Electrochimica Acta 2014, 129, 55-61.

**[2]** Chang C-H; Chung S-H; Manthiram A. Ultra-lightweight PANiNF/MWCNT-functionalized separators with synergistic suppression of polysulfide migration for Li–S batteries with pure sulfur cathodes. Journal of Materials Chemistry A 2015, 3, 18829-18834.

**[3]** Jia-Qi; Huang T-ZZ; Qiang Zhang; Hong-Jie Peng; Cheng-Meng Chen; and Fei Wei. Permselective Graphene Oxide Membrane for Highly Stable and Anti-Self-Discharge Lithium Sulfur Batteries. ACS Nano 2015, 9 3002–3011.

**[4]** Zhang K; Qin F; Fang J; Li Q; Jia M; Lai Y; Zhang Z; Li J. Nickel foam as interlayer to improve the performance of lithium–sulfur battery. Journal of Solid State Electrochemistry 2013, 18, 1025-1029.

**[5]** Cai W; Li G; Zhang K; Xiao G; Wang C; Ye K; Chen Z; Zhu Y; Qian Y. Conductive Nanocrystalline Niobium Carbide as High-Efficiency Polysulfides Tamer for Lithium-Sulfur Batteries. Advanced Functional Materials 2018, 28.

**[6]** Luo L; Qin X; Wu J; Liang G; Li Q; Liu M; Kang F; Chen G; Li B. An interwoven MoO3@CNT scaffold interlayer for high-performance lithium–sulfur batteries. Journal of Materials Chemistry A 2018, 6, 8612-8619.

**[7]** He J; Chen Y; Manthiram A. Vertical Co9S8 Hollow Nanowall Arrays Grown on A Celgard Separator as A Multifunctional Polysulfide Barrier for High-Performance Li–S Batteries. Energy & Environmental Science 2018, 11, 2560-2568.

**[8]** He J; Luo L; Chen Y; Manthiram A. Yolk-Shelled C@Fe3O4 Nanoboxes as Efficient Sulfur Hosts for High-Performance Lithium-Sulfur Batteries. Adv Mater 2017, 29.
